# Supplementary material for: Incidence and Outcomes of Acute Respiratory Distress Syndrome – Experience of a Medical Center in Taiwan
Source: Research Square preprint supplement (doi:10.21203/rs.3.rs-1953039/v1), 2022-09-06
Supplement: Supplementary file 1 [file 1021a7c74c32b597b97e2cf4.docx]

**Supplementary Information**

**Contents**

| Supplementary Table S1. Characteristics of ARDS patients categorized by severity |
| --- |
| Supplementary Table S2. Mechanical ventilation and arterial blood gas on admission by ARDS severity |
| Supplementary Table S3. Characteristics of ARDS patients between DP≦14 and DP＞14 |
| Supplementary Table S4.Mechanical ventilation and adjunctive therapy between DP≦14 and DP＞14 |

**Supplementary Table S1. Characteristics of ARDS patients categorized by severity**

| **Characteristics** | **All**  **(N=370)** | **Mild**  **(N=103, 27.8%)** | **Moderate**  **(N=196, 53%)** | **Severe**  **(N=71, 19.2%)** | ***P* Value b** |
| --- | --- | --- | --- | --- | --- |
| Age (years) | 67.7 ± 16.9 | 68.3 ± 17.1 | 67.5 ± 17.2 | 67.3 ± 16.0 | 0.916 |
| Male, No. (%) | 252 (68.1%) | 73 (70.9%) | 130 (66.3%) | 49 (69.0%) | 0.713 |
| BMI(kg/m2) | 23.7 ± 4.9 | 22.9 ± 4.9 | 23.6 ± 4.7 | 25.1 ± 5.2 | 0.018 |
| **Admission source,** **No. (%)** |  |  |  |  |  |
| Emergency Room | 303 (81.9%) | 85 (82.5%) | 157 (80.1%) | 61 (85.9%) | 0.860 |
| Non- Emergency Room | 67 (18.1%) | 18 (17.5%) | 39 (19.9%) | 10 (14.1%) |
| **ICU type,** **No. (%)** |  |  |  |  |  |
| Medical | 295 (79.7%) | 81 (78.6%) | 152 (77.6%) | 62 (87.3%) | 0.203 |
| Surgical | 75 (20.3%) | 22 (21.4%) | 44 (22.4%) | 9 (12.7%) |
| **Severity scores** |  |  |  |  |  |
| APACHE II score | 28.0 ± 6.9 | 25.9 ± 6.3 | 27.9 ± 6.9 | 31.7 ± 5.9 | <0.0001 |
| SOFA score, Day 1 | 10.3 ± 3.5 | 9.5 ± 3.2 | 10.1 ± 3.5 | 12.1 ± 3.5 | <0.0001 |
| SOFA score, Day 3 | 9.3 ± 4.2 | 8.4 ± 3.7 | 8.8 ± 4.0 | 7.7 ± 4.4 | <0.0001 |
| SOFA score, Day 7 | 7.7 ± 4.2 | 6.6 ± 3.1 | 12.1 ± 4.1 | 9.5 ± 4.7 | 0.001 |
| **Comorbidities, No. (%)** |  |  |  |  |  |
| Cardiovascular disease | 102 (27.6%) | 35 (34.0%) | 55 (28.1%) | 12 (16.9%) | 0.130 |
| Cerebrovascular disease | 75 (20.3%) | 21 (20.3%) | 40 (20.4%) | 14 (19.7%) | 0.946 |
| Dementia | 26 (7.0%) | 10 (9.7%) | 16 (8.2%) | 0 (0%) | 0.046 |
| Chronic pulmonary disease | 76 (20.5%) | 28 (27.2%) | 38 (19.4%) | 10 (14.1%) | 0.215 |
| Rheumatic disease | 30 (8.1%) | 7 (6.8%) | 18 (9.2%) | 5 (7.0%) | 0.680 |
| Hepatic disease | 67 (18.1%) | 23 (22.3%) | 30 (15.3%) | 14 (19.7%) | 0.357 |
| Diabetes mellitus | 145 (39.2%) | 39 (37.9%) | 77 (39.3%) | 29 (40.8%) | 0.559 |
| Renal disease | 127 (34.3%) | 38 (36.9%) | 66 (33.7%) | 23 (32.4%) | 0.979 |
| Malignancy | 141 (38.1%) | 45 (43.7%) | 72 (36.7%) | 24 (33.8%) | 0.716 |
| Charlson Comorbidity Index(CCI) | 3.6 ± 2.9 | 4.0 ± 3.0 | 3.4 ± 2.9 | 3.9 ± 3.0 | 0.203 |
| **Etiology of ARDS,** **No. (%)** |  |  |  |  |  |
| **Pulmonary** | 298 (80.5%) | 82 (79.6%) | 156 (79.6%) | 60 (84.5%) |  |
| Pneumonia | 255 (68.9%) | 70 (68.0%) | 132 (67.3%) | 53 (74.6%) | 0.507 |
| Aspiration | 37 (10.0%) | 12 (11.7%) | 19 (9.7%) | 6 (8.5%) | 0.770 |
| Pulmonary contusion | 6 (1.6%) | 0 (0%) | 5 (2.6%) | 1 (1.4%) | 0.249 |
| **Extrapulmonary** | 72 (19.5%) | 21 (20.4%) | 40 (20.4%) | 11 (15.5%) | 0.596 |
| Sepsis (non-pulmonary) | 48 (13.0%) | 15 (14.6%) | 26 (13.3%) | 7 (9.9%) | 0.652 |
| Trauma or hemorrhagic shock | 4 (1.1%) | 2 (%) | 2 (%) | 0 (%) | 0.473 |
| Pancreatitis | 4 (1.1%) | 0 (0%) | 4 (2.0%) | 0 (0%) | 0.166 |
| TRALI | 10 (2.7%) | 2 (1.9%) | 5 (2.6%) | 3 (4.2%) | 0.647 |
| **Clinical outcome** |  |  |  |  |  |
| ICU length of stay | 13.0 (8-22) | 14.0 (8-22) | 13.0 (8-21) | 12.0 (7-26) | 0.951 |
| Hospital length of stay | 29.5 (18-46) | 32 (19-48) | 30.0 (18-45) | 26.0 (14-46) | 0.273 |
| Ventilator-day | 13.0 (7-24) | 13 (7-23) | 13 (7-24) | 11 (6-26) | 0.904 |
| Hospital Mortality, No. (%) | 156 (42.2%) | 37 (35.9%) | 86 (43.9%) | 33 (46.5%) | 0.298 |

Abbreviations: ARDS, acute respiratory distress syndrome; BMI, Body Mass Index*;* ICU, intensive care unit; APCHE II, Acute Physiology And Chronic Health Evaluation II; SOFA, The sequential organ failure assessment score; CCI, Charlson comorbidity index; TRALI, transfusion-related acute lung injury; sd , standard deviation; IQR (interquartile range).

a ARDS severity determined from worst partial pressure of oxygen to fraction of inspired oxygen ratio within first 24 hours following ARDS diagnosis.

b *P* value represents comparisons across the ARDS severity categories for each variable

**Supplementary Table S2. Mechanical ventilation and arterial blood gas on**

**admission by ARDS severity**

| Variables | All (N=370) | Mild (N=103) | | Moderate (N=196) | | Severe (N=71) | *P* Value b |
| --- | --- | --- | --- | --- | --- | --- | --- |
| **Ventilator settings, first day of ARDS (Day0)** | | | | | | | |
| Mode, No. (%) |  |  | |  | |  |  |
| Volume target, No. (%) | 305 (82.4%) | 85 (82.5%) | | 158 (80.6%) | | 62 (87.3%) | 0.602 |
| Pressure target, No. (%) | 65 (17.6%) | 18 (17.5%) | | 38 (19.4%) | | 9 (12.7%) |
| FiO2 | 0.6 ± 0.2 | 0.5 ± 0.2 | | 0.6 ± 0.2 | | 0.9 ± 0.2 | <0.0001 |
| PaO2 (mmHg) | 103.9 ± 53.3 | 149.4 ± 75.0 | | 90.7 ± 26.6 | | 74.6 ± 20.5 | <0.0001 |
| P/F ratio | 173.5 ± 88.4 | 276.4 ± 93.3 | | 151.4 ± 32.7 | | 85.1 ± 25.1 | <0.0001 |
| PEEP (cmH2o) | 8.8 ± 4.1 | 7.1 ± 2.7 | | 9.2 ± 4.7 | | 10.2 ± 3.0 | <0.0001 |
| Tidal Volume (vt/cc/kg) | 7.5 ± 1.6 | 7.9 ± 1.3 | | 7.4 ± 1.6 | | 7.0 ± 1.7 | 0.001 |
| RR (1breath/min ) | 22.2 ± 5.4 | 20.5 ± 7.8 | | 22.2 ± 5.4 | | 24.4 ± 5.4 | <0.0001 |
| PIP (mmHg) | 24.9 ± 5.9 | 23.5 ± 5.0 | | 25.0 ± 5.1 | | 26.6 ± 6.0 | 0.001 |
| Pplat (cmH2o) | 21.5 ± 5.2 | 19.5 ± 4.2 | | 21.6 ± 5.3 | | 24.2 ± 5.1 | <0.0001 |
| Driving pressure (cmH2o) | 12.9 ± 4.1 | 12.6 ± 4.3 | | 12.7 ± 3.8 | | 13.9 ± 4.6 | 0.1 |
| Compliance (cmH2o) | 32.9 ± 12.3 | 35.7 ± 13.0 | | 32.7 ± 11.9 | | 29.5 ± 11.5 | 0.008 |
| **Artery blood gas(ABG)-patient in ICU 24hrs** | | | | | | | |
| pH | 7.4 ± 0.1 | 7.38 ± 0.1 | | 7.36 ± 0.1 | | 7.33 ± 0.1 | 0.023 |
| PaO2 (mmHg) | 122.2 ± 98.0 | 170.8 ± 155.1 | | 106.7±51.9 | | 94.0 ± 54.3 | <0.0001 |
| PaCO2 (mmHg) | 41.8 ± 28.2 | 37.7 ± 10.2 | | 42.8 ± 32.9 | | 41.6 ± 13.4 | 0.179 |
| HCO3, | 21.9 ± 5.0 | 21.2 ± 4.8 | | 22.4 ± 6.2 | | 21.5 ± 5.3 | 0.014 |
| **Adjunctive Therapy, No. (%)** | | | | | | | |
| ECMO | 7 (1.9%) | 0 (0%) | 3 (1.5%) | | 4 (5.6%) | | 0.024 |
| Lung recruitment maneuver | 48 (13.0%) | 5 (4.9%) | 24 (12.2%) | | 19 (26.8%) | | <0.0001 |
| Prone | 23 (6.2%) | 2 (1.9%) | 10 (5.1%) | | 11 (15.5%) | | 0.001 |
| Neuromuscular blockade | 159 (43.0%) | 21 (13.2%) | 92 (46.9%) | | 46 (64.8%) | | <0.0001 |

Abbreviations: ARDS, acute respiratory distress syndrome; RR, respiratory rate; PEEP, positive end-expiratory pressure; FiO2, inspired fraction of oxygen; PaO2, partial pressure of oxygen; PaO2/FIO2, partial pressure of oxygen to fraction of inspired oxygen; Pplat, plateau pressure; VT, tidal volume; PIP, peak inspiratory pressure; ECMO, extracorporeal membrane oxygenation; sd , standard deviation; IQR (interquartile range); ABG, Artery blood gas .

a ARDS severity determined from worst partial pressure of oxygen to fraction of inspired oxygen ratio within first 24 hours following ARDS diagnosis.

b *P* value represents comparisons across the ARDS severity categories for each variable.

**Supplementary Table S3. Characteristics of ARDS patients between**

**DP≦14 and DP＞14**

| **Characteristics** | **All** | **DP≦14** | **DP＞14** | ***P* Valuea** |
| --- | --- | --- | --- | --- |
| N=370 | N=211 /318(66.4%) | N=107/318 (33.6%) |
| Age (years) | 67.7 ± 16.9 | 68.6 ± 15.8 | 67.2 ± 18.8 | 0.486 |
| Male, No. (%) | 252 (68.1%) | 141 (66.8%) | 74 (69.2%) | 0.674 |
| BMI (kg/m2) | 23.7 ± 4.9 | 23.7 ± 4.9 | 24.4 ± 5.2 | 0.220 |
| **Admission source, No. (%)** |  |  |  |  |
| Emergency Room (ER) | 303 (81.9%) | 172 (81.5%) | 92 (86.0%) | 0.604 |
| Non-Emergency Room | 67 (18.1%) | 39 (18.5%) | 15 (14.0%) |
| **Type of ICU, No. (%)** |  |  |  |  |
| Medical | 295 (79.7%) | 178 (84.4%) | 77 (72.0%) | 0.009 |
| Surgical | 75 (20.3%) | 33 (15.6%) | 30 (28.0%) |
| **Severity scores** |  |  |  |  |
| APACHE ll score | 28.0 ± 6.9 | 27.7 ± 6.8 | 28.7 ± 6.8 | 0.192 |
| SOFA score, Day 1 | 10.3 ± 3.5 | 10.0 ± 3.4 | 10.9 ± 3.7 | 0.030 |
| SOFA score, Day 3 | 9.3 ± 4.2 | 8.8 ± 3.9 | 9.8 ± 4.7 | 0.056 |
| SOFA score, Day 7 | 7.7 ± 4.2 | 7.3 ± 4.0 | 8.0 ± 4.7 | 0.254 |
| **ARDS Hypoxia severity** |  |  |  |  |
| Mild | 103 (27.8%) | 68 (32.2%) | 27 (28.4%) | 0.432 |
| Moderate | 196 (53%) | 105 (49.8%) | 58 (35.6%) |
| Severe | 71 (19.2%) | 38 (18.0%) | 22 (36.7%) |
| **Comorbidities, No. (%)** |  |  |  |
| Cardiovascular disease | 102 (27.6%) | 59 (65.6%) | 31 (34.4%) | 0.850 |
| Cerebrovascular disease | 75 (20.3%) | 47 (69.1%) | 21 (30.9%) | 0.586 |
| Dementia | 26 (7.0%) | 17 (65.4%) | 9 (34.6%) | 0.913 |
| Chronic pulmonary disease | 76 (20.5%) | 42 (68.9%) | 19 (31.3%) | 0.646 |
| Rheumatic disease | 30 (8.1%) | 17 (70.8%) | 7 (29.2%) | 0.629 |
| Hepatic disease | 67 (18.1%) | 36 (66.7%) | 18 (33.3%) | 0.957 |
| Diabetes mellitus | 145 (39.2%) | 88 (68.8%) | 40 (31.3%) | 0.458 |
| Renal disease | 127 (34.3%) | 71 (64.5%) | 39 (35.5%) | 0.620 |
| Malignancy | 141 (38.1%) | 72 (60.0%) | 48 (40.0%) | 0.062 |
| Charlson Comorbidity Index (CCI) | 3.6 ± 2.9 | 3.6 ± 2.8 | 3.9 ± 3.2 | 0.378 |
| **Etiology of ARDS, No. (%)** |  |  |  |  |
| **Pulmonary, No. (%)** |  |  |  |  |
| Pneumonia | 255 (68.9%) | 145 (68.7%) | 76 (71.0%) | 0.673 |
| Aspiration | 37 (10.0%) | 23 (10.9%) | 8 (7.5%) | 0.331 |
| Pulmonary contusion | 6 (1.6%) | 3 (1.4%) | 2 (1.9%) | 0.762 |
| **Extrapulmonary, No. (%)** |  |  |  |  |
| Sepsis (non-pulmonary source) | 48 (13%) | 24 (11.4%) | 16 (15.0%) | 0.363 |
| Trauma or hemorrhagic shock | 4 (1.1%) | 2 (0.9%) | 1 (0.9%) | 0.991 |
| Pancreatitis | 4 (1.1%) | 2 (0.9%) | 2 (1.9%) | 0.486 |
| TRALI | 10 (2.7%) | 8 (3.8%) | 1 (0.9%) | 0.147 |
| **Clinical outcomes** |  |  |  |  |
| ICU length of stay | 13 (8-22) | 13 (8-21) | 15 (8-24) | 0.630 |
| Hospital length of stay | 29.5 (18-46) | 29 (18-44) | 33 (18-51) | 0.153 |
| Ventilator-day | 13 (7-24) | 13 (7-21) | 15 (7-28) | 0.170 |
| **Discharge Status** |  |  |  |  |
| Survival | 214 (57.8%) | 140 (66.4%) | 51 (47.7%) | 0.001 |
| Mortality | 156 (42.2%) | 71 (33.6%) | 56 (52.3%) |

Abbreviations: ARDS, acute respiratory distress syndrome; BMI, Body Mass Index*;* ICU, intensive care unit; APCHE II, Acute Physiology And Chronic Health Evaluation II; SOFA, The sequential organ failure assessment score; CCI, Charlson comorbidity index; TRALI, transfusion-related acute lung injury; sd , standard deviation; IQR (interquartile range) ;DP, driving pressure.

a *P* value represents comparisons between the DP≦14 and DP＞14 ARDS patients.

**Supplementary Table S4**. **Mechanical ventilation and adjunctive therapy**

**between DP≦14 and DP＞14**

| **Characteristics** | **All** | **DP≦14** | **DP＞14** | ***P* Valuea** |
| --- | --- | --- | --- | --- |
| **N=370** | **N=211 (57.0%)** | **N=107 (28.9%)** |
| **Ventilator settings**, **first day of ARDS(Day0)** |  |  |  |  |
| **Mode, No. (%)** |  |  |  |  |
| Volume -targeted | 305 (82.4%) | 190 (90%) | 88 (82.2%) | 0.047 |
| Pressure-targeted | 65 (17.6%) | 21 (10.0%) | 19 (17.8%) |
| FiO2 (%) | 0.6 ± 0.2 | 0.6 ± 0.2 | 0.7 ± 0.2 | 0.021 |
| PaO2 (mmHg) | 103.9 ± 53.3 | 104.3 ± 57.7 | 100.1 ± 40.9 | 0.501 |
| P/F ratio (%) | 173.5 ± 88.4 | 178.9 ± 93.6 | 158.4 ± 71.1 | 0.047 |
| PEEP (cmH2o) | 8.8 ± 4.1 | 9.0 ± 3.2 | 8.9 ± 5.8 | 0.799 |
| Tidal Volume (vt/cc/kg) | 7.5 ± 1.6 | 7.3 ± 1.4 | 7.3 ± 1.5 | 0.997 |
| RR (1breath/min ) | 22.2 ± 5.4 | 22.2 ± 5.0 | 22.5 ± 6.0 | 0.627 |
| PIP (mmHg) | 24.9 ± 5.9 | 23.4 ± 4.3 | 27.7 ± 5.2 | <0.0001 |
| Pplat (cmH2o) | 21.5 ± 5.2 | 19.9 ± 3.9 | 25.2 ± 4.9 | <0.0001 |
| Driving pressure (cmH2o) | 12.9 ± 4.1 | 11.0 ± 2.4 | 16.8 ± 4.1 | <0.0001 |
| Compliance (cmH2o) | 32.9 ± 12.3 | 39.7 ± 12.5 | 26.7 ± 9.0 | <0.0001 |
| **Artery blood gas(ABG)-patient in ICU 24hrs** |  |  |  |  |
| pH | 7.4 ± 0.1 | 7.4 ± 0.1 | 7.3 ± 0.1 | 0.012 |
| PaO2 (mmHg) | 122.2 ± 98.0 | 124.7 ± 117.2 | 115.5 ± 61.3 | 0.444 |
| PaCO2 (mmHg) | 41.8 ± 28.2 | 38.9 ± 10.2 | 45.4 ± 43.2 | 0.124 |
| HCO3 | 21.9 ± 5.0 | 22.0 ± 5.4 | 22.0 ± 6.3 | 0.918 |
| **Adjunctive Therapy, No. (%)** |  |  |  |  |
| ECMO | 7 (1.9%) | 1 (0.5%) | 5 (4.7%) | 0.009 |
| Lung recruitment maneuver | 48 (13.0%) | 31 (14.7%) | 13 (12.1%) | 0.535 |
| Prone position ventilation | 23 (6.2%) | 12 (5.7%) | 7 (6.5%) | 0.761 |
| Neuromuscular blockade | 159 (43.0%) | 84 (39.8%) | 49 (45.8%) | 0.307 |

Abbreviations: ARDS, acute respiratory distress syndrome;RR, respiratory rate; PEEP, positive end-expiratory pressure; FiO2, inspired fraction of oxygen; PaO2, partial pressure of oxygen; PaO2/FIO2, partial pressure of oxygen to fraction of inspired oxygen; Pplat, plateau pressure; VT, tidal volume; PIP, peak inspiratory pressure; ECMO, extracorporeal membrane oxygenation; sd , standard deviation; IQR (interquartile range); ABG, Artery blood gas.

a P value represents comparisons between the DP≦14 and DP＞14 ARDS patients.
